# Supplementary material
Source: Research Square preprint supplement (doi:10.21203/rs.3.rs-9039262/v1)
Supplement: Supplementary file 1 [file 027a4155c4a7d588a6e102cf.docx]

***Additional file 1: Survey Questionnaires — Shava et al., BMC Public Health***

**Questionnaire A: Structured Questionnaire for Nyaure Clinic Nurses**

**TOPIC: A STUDY TO DETERMINE FACTORS AFFECTING THE ACCESS TO EXPANDED PROGRAMME OF IMMUNISATION SERVICES BY CHILDREN AT NYAURE CLINIC IN GOROMONZI DISTRICT**

**Instructions:** Please respond to the following questions as fully and honestly as you can. Your responses will be treated with confidentiality. You are not required to fill in your name. Where a question requires you to tick in the box provided, please do so. Where a question requires you to explain, please do so in the space provided.

**Section A: Demographic Data**

01. What is your age range?

a) 18–24 years

b) 25–31 years

c) 32–38 years

d) 39 years and above

02. What is your sex?

a) Male

b) Female

03. What is your designation?

a) RGN

b) SCN

c) PCN

d) Other (specify): .......................................

04. How long have you been stationed at this facility?

a) Less than 1 year

b) 1–2 years

c) 3–4 years

d) Over 5 years

**Section B: Opinion on Immunisation Coverage**

05. How often do you discuss EPI coverage at your facility with caregivers?

a) Most often

b) Often

c) Seldom

d) Rarely

e) Never

06. How do you rate your EPI coverage for the past 3 years?

a) Very high

b) High

c) Neutral

d) Low

e) Very low

**Section C: Factors Affecting Access to Immunization**

Please tick in the appropriate box.

| **Question** | **Yes** | **Not Sure** | **No** |
| --- | --- | --- | --- |
| Does religion contribute to low EPI coverage in Nyaure area? |  |  |  |
| Is distance a barrier to access of EPI services at Nyaure Clinic? |  |  |  |
| Does political interference have a bearing on low EPI coverage in Nyaure? |  |  |  |
| Does poverty contribute to low EPI coverage? |  |  |  |

**Section D: Strategies to Increase EPI Coverage**

07. Does door-to-door immunization contribute to an increase in EPI coverage?

a) Yes

b) No

08. Do outreach services help in raising EPI coverages?

a) Yes

b) No

c) Not sure

Thank you for your participation.

**Questionnaire B: Structured Questionnaire for Nyaure Caregivers**

**TOPIC: A STUDY TO DETERMINE FACTORS AFFECTING THE ACCESS TO EXPANDED PROGRAMME OF IMMUNISATION SERVICES BY CHILDREN AT NYAURE CLINIC IN GOROMONZI DISTRICT**

**Instructions:** Please respond to the following questions as fully and honestly as you can. Your responses will be treated with confidentiality. You are not required to fill in your name. Where a question requires you to tick in the box provided, please do so. Where a question requires you to explain, please do so in the space provided.

**Section A: Demographic Data**

01. What is your age range?

a) 18–24 years

b) 25–31 years

c) 32–38 years

d) 39 years and above

02. What is your sex?

a) Male

b) Female

c) Other (specify): .......................................

03. What is your level of education?

a) Primary

b) Secondary

c) Tertiary

04. What is your employment status?

a) Employed

b) Self-employed

c) Not employed

**Section B: Knowledge of EPI Services**

05. Have you ever received information about the importance of EPI?

a) Yes

b) No

06. If yes to Question 5, what was the source of the information?

a) Village health worker (VHW)

b) Health workers at the facility

c) Public media

d) Other (specify): .......................................

07. Have you received health education on EPI issues during ANC visits?

a) Yes

b) No

08. Have you ever received health education on child vaccination during PNC?

a) Yes

b) No

09. Are vaccines always available at the facility?

a) Yes

b) No

c) Sometimes

10. Is distance to the health facility affecting the vaccination of under-five children?

a) Yes

b) No

c) Partly

11. What can be done to ensure all children get access to EPI services?

.........................................................................................................

.........................................................................................................

Thank you for your participation.

**Questionnaire C: Structured Questionnaire for Nyaure Community Health Workers**

**TOPIC: A STUDY TO DETERMINE FACTORS AFFECTING THE ACCESS TO EXPANDED PROGRAMME OF IMMUNISATION SERVICES BY CHILDREN AT NYAURE CLINIC IN GOROMONZI DISTRICT**

**Instructions:** Please respond to the following questions as fully and honestly as you can. Your responses will be treated with confidentiality. You are not required to fill in your name. Where a question requires you to tick in the box provided, please do so. Where a question requires you to explain, please do so in the space provided.

**Section A: Demographic Data**

01. What is your age range?

a) 18–24 years

b) 25–31 years

c) 32–38 years

d) 39 years and above

02. What is your sex?

a) Male

b) Female

c) Other (specify): .......................................

03. What is your level of education?

a) Primary

b) Secondary

c) Tertiary

04. How long have you been in this catchment area?

a) Less than 1 year

b) 1–2 years

c) 3–4 years

d) Over 5 years

05. How many years have you served as a village health worker (VHW)?

a) Less than 1 year

b) 1–2 years

c) 3–4 years

d) Over 5 years

**Section B: Knowledge of EPI Services**

06. Have you ever received information about the importance of EPI?

a) Yes

b) No

07. If yes to Question 6, what was the source of the information?

a) Health workers at the facility

b) Media

c) Other (specify): .......................................

08. Are there villages far from the facility?

a) Yes

b) No

09. Are there religions or cultures in this area that do not approve of vaccinations?

a) Yes

b) No

10. What strategies can be used to raise immunization coverages?

.........................................................................................................

.........................................................................................................

Thank you for your participation.
